# Supplementary material
Source: Elsevier journal article supplement (https://www.sciencedirect.com/science/article/pii/S1665268119300092)
Supplement: mmc1 [file S1665268119300092:mmc1.doc]

Supplementary Table 1. Categorization of the 120 nodules according to the Li-RADS criteria and reference standard diagnosis by histology.

|  | **TOTAL Nodules** | **HCC** | **iCC** | **Mtx** | **NET** | **LGDN/HGDN** | **Benign nodules** |
| --- | --- | --- | --- | --- | --- | --- | --- |
| **LR-1** | 0 | 0 | 0 | 0 | 0 | 0 | 0 |
| **LR-2** | 8 | 0 | 1 | 0 | 0 | 3 | 5 |
| **LR-3** | 35 | 14 | 6 | 4 | 1 | 5 | 5 |
| **LR-4** | 9 | 4 | 1 | 2 | 1 | 0 | 1 |
| **LR4/LR-5** | 17 | 16 | 0 | 1 | 0 | 0 | 1 |
| **LR-5** | 51 | 50 | 0 | 0 | 0 | 0 | 0 |
| **Total** | 120 | 84 | 8 | 0 | 2 | 1 | 0 |

HCC, hepatocellular carcinoma; iCC, intrahepatic cholangiocarcinoma; MTX, metastasis; NET, neuroendocrine tumor; HGDN, high grade dysplastic nodule; LGDN, low grade dysplastic nodule; benign nodules: macroregenerative nodules 5, steatotic nodules 5, granulomas 2.
